# Supplementary material for: Whole-Genome Sequencing to Predict Mycobacterium tuberculosis Drug Resistance: A Retrospective Observational Study in Eastern China
Source: MDPI journal article supplement (doi:10.3390/antibiotics12081257), 2023-07-31
Supplement: s1 [file s1]

**Table S2. Drug-resistance associated gene mutations detected by WGS**

| Drug         | Drug-resistance associated gene mutations          | Phenotypic DST |           | Total |
|--------------|----------------------------------------------------|----------------|-----------|-------|
|              |                                                    | Resistant      | Sensitive |       |
| rifampicin   | None                                               | 6              | 1022      | 1028  |
|              | <i>rpoB</i> _p.Asn437Asp, <i>rpoB</i> _p.Leu430Pro | 1              | 0         | 1     |
|              | <i>rpoB</i> _p.Asp435Gly                           | 1              | 0         | 1     |
|              | <i>rpoB</i> _p.Asp435Gly, <i>rpoB</i> _p.His445Asn | 1              | 0         | 1     |
|              | <i>rpoB</i> _p.Asp435Tyr                           | 1              | 0         | 1     |
|              | <i>rpoB</i> _p.Asp435Val                           | 1              | 0         | 1     |
|              | <i>rpoB</i> _p.His445Arg                           | 2              | 0         | 2     |
|              | <i>rpoB</i> _p.His445Asp                           | 4              | 1         | 5     |
|              | <i>rpoB</i> _p.His445Gln, <i>rpoB</i> _p.Leu430Pro | 1              | 0         | 1     |
|              | <i>rpoB</i> _p.His445Ser                           | 1              | 0         | 1     |
|              | <i>rpoB</i> _p.His445Tyr                           | 4              | 2         | 6     |
|              | <i>rpoB</i> _p.Leu430Pro                           | 0              | 2         | 2     |
|              | <i>rpoB</i> _p.Leu452Pro                           | 5              | 2         | 7     |
|              | <i>rpoB</i> _p.Ser441Leu                           | 1              | 0         | 1     |
|              | <i>rpoB</i> _p.Ser450Leu                           | 42             | 2         | 44    |
|              | <i>rpoB</i> _p.Ser450Phe                           | 1              | 0         | 1     |
|              | <i>rpoB</i> _p.Ser450Trp                           | 1              | 0         | 1     |
|              | <i>rpoB</i> _p.Val170Phe                           | 0              | 1         | 1     |
| isoniazid    | None                                               | 22             | 965       | 987   |
|              | <i>inhA</i> _c.-154G>A                             | 1              | 4         | 5     |
|              | <i>inhA</i> _c.-770T>C                             | 1              | 0         | 1     |
|              | <i>inhA</i> _c.-770T>C, <i>katG</i> _p.Ser315Thr   | 2              | 0         | 2     |
|              | <i>inhA</i> _c.-777C>T                             | 8              | 9         | 17    |
|              | <i>inhA</i> _c.-777C>T, <i>katG</i> _p.Ser315Thr   | 1              | 0         | 1     |
|              | <i>katG</i> _p.Ser315Asn                           | 2              | 0         | 2     |
|              | <i>katG</i> _p.Ser315Thr                           | 85             | 3         | 88    |
|              | <i>katG</i> _p.Trp198*                             | 1              | 0         | 1     |
|              | <i>katG</i> _p.Trp477*                             | 1              | 0         | 1     |
| ethambutol   | None                                               | 37             | 1021      | 1058  |
|              | <i>embA</i> _c.-12C>T, <i>embB</i> _p.Gly406Ala    | 1              | 0         | 1     |
|              | <i>embB</i> _p.Asp354Ala                           | 1              | 4         | 5     |
|              | <i>embB</i> _p.Gln497Arg                           | 2              | 1         | 3     |
|              | <i>embB</i> _p.Gly406Ala                           | 3              | 1         | 4     |
|              | <i>embB</i> _p.Gly406Ala, <i>embB</i> _p.Met306Ile | 2              | 0         | 2     |
|              | <i>embB</i> _p.Gly406Asp                           | 1              | 1         | 2     |
|              | <i>embB</i> _p.Met306Ile                           | 4              | 6         | 10    |
|              | <i>embB</i> _p.Met306Leu                           | 1              | 1         | 2     |
|              | <i>embB</i> _p.Met306Val                           | 11             | 7         | 18    |
| levofloxacin | None                                               | 24             | 1036      | 1060  |
|              | <i>gyrA</i> _p.Ala90Val                            | 11             | 3         | 14    |

|              |                                             |    |      |      |
|--------------|---------------------------------------------|----|------|------|
|              | <i>gyrA</i> _p.Asp94Ala                     | 1  | 1    | 2    |
|              | <i>gyrA</i> _p.Asp94Asn                     | 7  | 0    | 7    |
|              | <i>gyrA</i> _p.Asp94Gly                     | 15 | 3    | 18   |
|              | <i>gyrA</i> _p.Asp94Tyr                     | 2  | 0    | 2    |
|              | <i>gyrB</i> _p.Asp461Asn                    | 0  | 1    | 1    |
|              | <i>gyrB</i> _p.Glu501Asp                    | 0  | 1    | 1    |
| moxifloxacin | None                                        | 13 | 1047 | 1060 |
|              | <i>gyrA</i> _p.Ala90Val                     | 3  | 11   | 14   |
|              | <i>gyrA</i> _p.Asp94Ala                     | 0  | 2    | 2    |
|              | <i>gyrA</i> _p.Asp94Asn                     | 3  | 4    | 7    |
|              | <i>gyrA</i> _p.Asp94Gly                     | 8  | 10   | 18   |
|              | <i>gyrA</i> _p.Asp94Tyr                     | 1  | 1    | 2    |
|              | <i>gyrB</i> _p.Asp461Asn                    | 0  | 1    | 1    |
|              | <i>gyrB</i> _p.Glu501Asp                    | 0  | 1    | 1    |
| streptomycin | None                                        | 63 | 935  | 998  |
|              | <i>gid</i> _c.102delG                       | 1  | 2    | 3    |
|              | <i>gid</i> _c.102delG, <i>rrs</i> _n.514A>C | 1  | 0    | 1    |
|              | <i>gid</i> _c.115delC                       | 2  | 2    | 4    |
|              | <i>gid</i> _p.Arg102*                       | 1  | 0    | 1    |
|              | <i>gid</i> _p.Glu103*                       | 1  | 0    | 1    |
|              | <i>gid</i> _p.Trp45*                        | 0  | 1    | 1    |
|              | <i>rpsL</i> _p.Lys43Arg                     | 72 | 4    | 76   |
|              | <i>rpsL</i> _p.Lys88Arg                     | 9  | 0    | 9    |
|              | <i>rpsL</i> _p.Lys88Gln                     | 0  | 1    | 1    |
|              | <i>rrs</i> _n.514A>C                        | 7  | 0    | 7    |
|              | <i>rrs</i> _n.517C>T                        | 2  | 1    | 3    |
| amikacin     | None                                        | 2  | 1100 | 1102 |
|              | <i>rrs</i> _n.1401A>G                       | 3  | 0    | 3    |
| kanamycin    | None                                        | 22 | 1077 | 1099 |
|              | <i>eis</i> _c.-10G>A                        | 1  | 0    | 1    |
|              | <i>eis</i> _c.-37G>T                        | 2  | 0    | 2    |
|              | <i>rrs</i> _n.1401A>G                       | 3  | 0    | 3    |
| capreomycin  | None                                        | 50 | 1052 | 1102 |
|              | <i>rrs</i> _n.1401A>G                       | 3  | 0    | 3    |
